# Supplementary material for: Room temperature CO oxidation catalysed by supported Pt nanoparticles revealed by solid-state NMR and DNP spectroscopy
Source: Royal Society of Chemistry journal article supplement (doi:10.1039/c9cy00684b), 2019-01-01

## Electronic Supporting Information

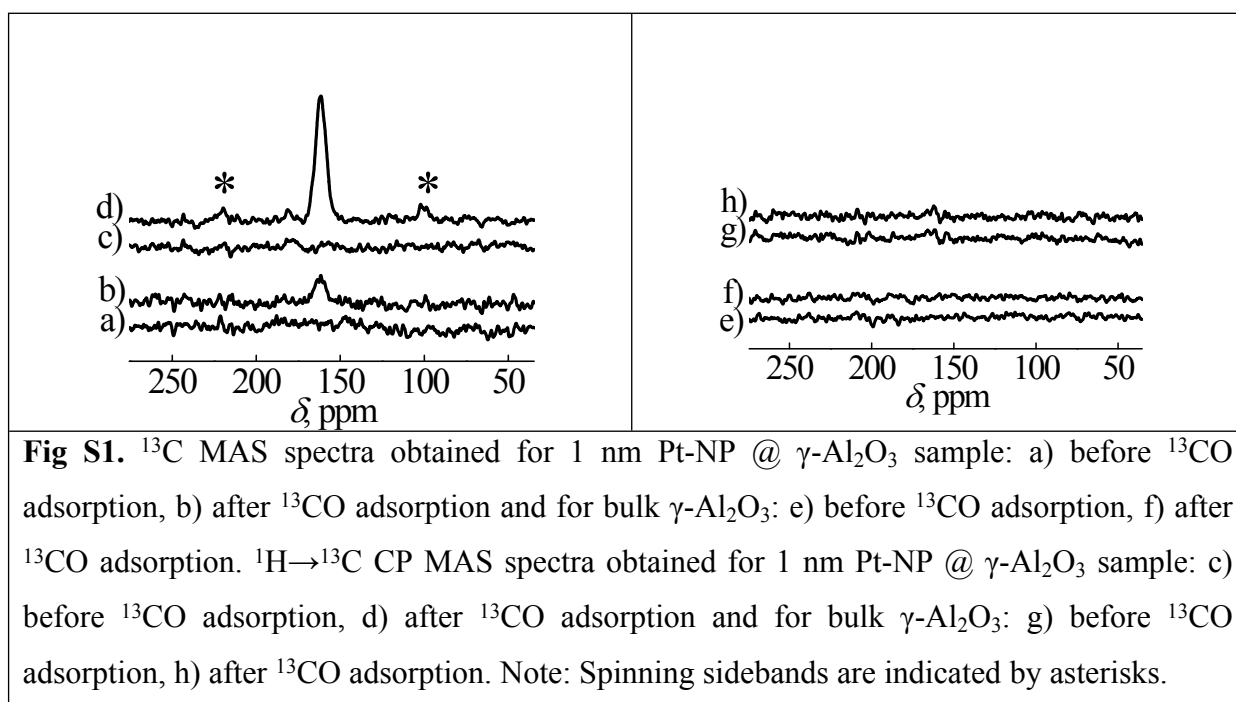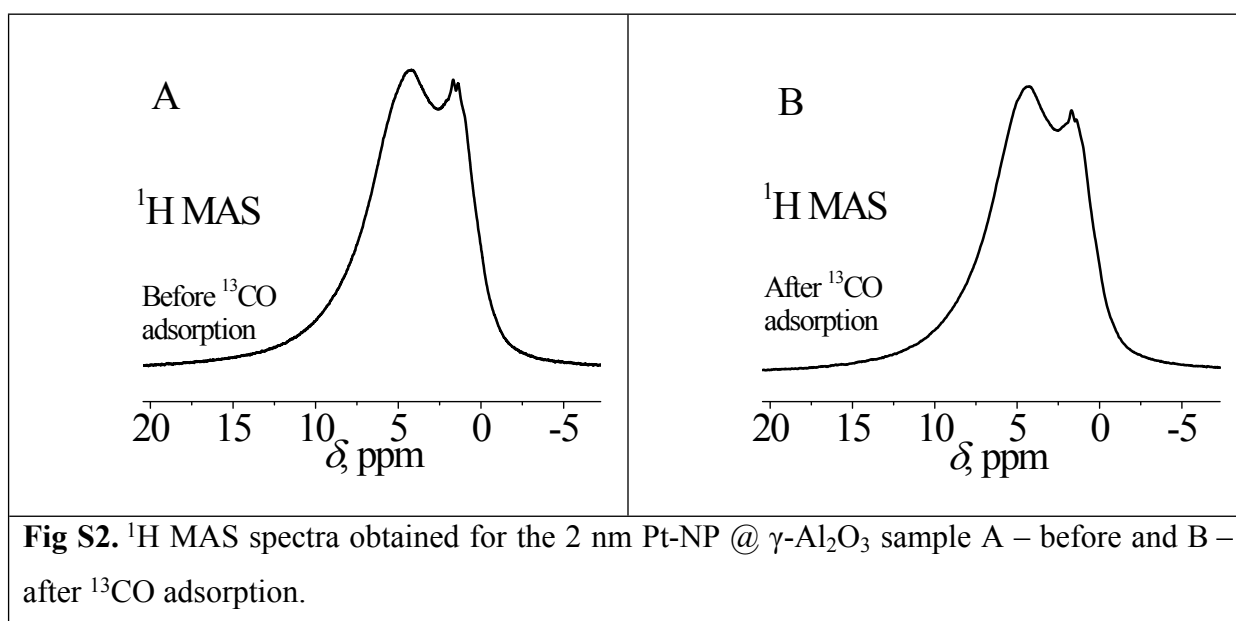

**Table S1.** Multiple Voigt curve fitting parameters of the fit performed for  $^1\text{H}$  MAS spectrum for sample 2 nm Pt-NP @  $\gamma\text{-Al}_2\text{O}_3$  after  $^{13}\text{CO}$  adsorption showed in Fig 3.

|                 |                                                 |             |                |
|-----------------|-------------------------------------------------|-------------|----------------|
| Model           | Voigt                                           |             |                |
| Equation        | $y = \text{nlf\_voigt}(x, y_0, xc, A, wG, wL);$ |             |                |
| Reduced Chi-Sqr | 2.64E+11                                        |             |                |
| Adj. R-Square   | 0.99997                                         |             |                |
|                 |                                                 | Value       | Standard Error |
|                 | y0                                              | -929267.966 | 112155.8913    |
|                 | xc                                              | 5.96292     | 0.07828        |
|                 | A                                               | 3.18E+08    | 1.89E+07       |
|                 | wG                                              | 5.42979     | 0.06158        |
|                 | wL                                              | 1.59018     | 0.06466        |
|                 | FWHM                                            | 6.3301      | 0.06997        |
|                 | y0                                              | -929267.966 | 112155.8913    |
|                 | xc                                              | 4.4         | 0              |
|                 | A                                               | 1.22E+09    | 2.50E+07       |
|                 | wG                                              | 2.10225     | 0.02338        |
|                 | wL                                              | 2.81721     | 0.05024        |
|                 | FWHM                                            | 3.98368     | 0.0213         |
|                 | y0                                              | -929267.966 | 112155.8913    |
|                 | xc                                              | 1.7         | 0              |
|                 | A                                               | 3.12E+06    | 235896.7997    |
|                 | wG                                              | 0.14849     | 0.01731        |
|                 | wL                                              | 0.10056     | 0.02514        |
|                 | FWHM                                            | 0.20945     | 0.00435        |
|                 | y0                                              | -929267.966 | 112155.8913    |
|                 | xc                                              | 1.4         | 0              |
|                 | A                                               | 4.05E+08    | 4.44E+06       |
|                 | wG                                              | 2.10648     | 0.01486        |
|                 | wL                                              | 0.86276     | 0.025          |
|                 | FWHM                                            | 2.60564     | 0.00424        |
|                 | y0                                              | -929267.966 | 112155.8913    |
|                 | xc                                              | 1.13943     | 0.00487        |
|                 | A                                               | 6.24E+07    | 2.46E+06       |
|                 | wG                                              | 1.56E-08    | 94.9527        |
|                 | wL                                              | 1.4074      | 0.02738        |
|                 | FWHM                                            | 1.40741     | 0.02738        |

**Table S2.** List of discussed samples, which were investigated by DNP.

$$W_1 = \frac{m_1}{m_1 + m_2} \cdot 100\% \quad - \text{weight \% of bulk } \gamma\text{-Al}_2\text{O}_3 \text{ in the sample,}$$

$$W_2 = \frac{m_1 + m_2}{m_1 + m_2 + m_3} \cdot 100\% \quad - \text{weight \% of solid in the sample, where } m_1 - \text{weight of bulk } \gamma\text{-Al}_2\text{O}_3, m_2 - \text{weight of supported Pt-NPs, } m_3 - \text{weight of DNP matrix.}$$

$\varepsilon (^1\text{H})$  – proton signal enhancement,  $\varepsilon (^{13}\text{C CP})$  –  $^1\text{H} \rightarrow ^{13}\text{C CP}$  signal enhancement,  $\varepsilon (^{13}\text{C})$  –  $^{13}\text{C}$  signal enhancement.

| Sample                                                             | $^{13}\text{CO}$<br>adsorption | $W_1$ | $W_2$ | $\varepsilon (^1\text{H})$ | $\varepsilon (^{13}\text{C CP})$ |                        | $\varepsilon (^{13}\text{C})$ |                        |
|--------------------------------------------------------------------|--------------------------------|-------|-------|----------------------------|----------------------------------|------------------------|-------------------------------|------------------------|
|                                                                    |                                |       |       |                            | TCE<br>(78 ppm)                  | Carbonate<br>(167 ppm) | TCE<br>(78 ppm)               | Carbonate<br>(167 ppm) |
| 2 nm Pt-NP<br>@ $\gamma\text{-Al}_2\text{O}_3$                     | No                             | 0     | 48    | $108 \pm 1$                | --                               | not<br>observed        | --                            | --                     |
|                                                                    | Yes                            | 0     | 45    | $107 \pm 1$                | $104 \pm 1$                      | $98 \pm 5$             | $12 \pm 1$                    | $20 \pm 4$             |
| 1 nm Pt-NP<br>@ $\gamma\text{-Al}_2\text{O}_3$                     | Yes                            | 0     | 50    | $108 \pm 1$                | $106 \pm 1$                      | $89 \pm 1$             | $11 \pm 1$                    | $15 \pm 3$             |
| 2 nm Pt-NP<br>@ $\text{TiO}_2$                                     | Yes                            | 0     | 37    | $169 \pm 1$                | $167 \pm 4$                      | not<br>observed        | --                            | --                     |
| 2 nm Pt-NP<br>@ $\text{TiO}_2$<br>+ $\gamma\text{-Al}_2\text{O}_3$ | No                             | 63    | 41    | $164 \pm 1$                | $157 \pm 2$                      | --*                    | --                            | --                     |
|                                                                    | Yes                            | 62    | 48    | $104 \pm 1$                | $101 \pm 2$                      | $192 \pm 64$           | --                            | --                     |
| 2 nm Pt-NP<br>@ $\text{SiO}_2$                                     | Yes                            | 0     | 30    | $106 \pm 1$                | --                               | not<br>observed        | --                            | --                     |
| 2 nm Pt-NP<br>@ $\text{SiO}_2$<br>+ $\gamma\text{-Al}_2\text{O}_3$ | Yes                            | 66    | 41    | $130 \pm 1$                | $132 \pm 3$                      | $114 \pm 14$           | --                            | --                     |
| 2 nm Pt-NP<br>@ fumed silica                                       | Yes                            | 0     | 39    | $120 \pm 1$                | --                               | not<br>observed        | $11 \pm 1$                    | not<br>observed        |
| 2 nm Pt-NP<br>@ fumed silica<br>+ $\gamma\text{-Al}_2\text{O}_3$   | Yes                            | 71    | 40    | $140 \pm 1$                | $127 \pm 2$                      | $127 \pm 12$           | --                            | --                     |
| $\gamma\text{-Al}_2\text{O}_3$                                     | No                             | 100   | 51    | $159 \pm 2$                | $154 \pm 5$                      | --*                    | --                            | --                     |
|                                                                    | Yes                            | 100   | 51    | $134 \pm 1$                | $128 \pm 3$                      | --*                    | --                            | --                     |
| $\gamma\text{-Al}_2\text{O}_3$                                     | $^{13}\text{CO}_2^{**}$        | 100   | 44    | $150 \pm 1$                | $149 \pm 3$                      | $155 \pm 7$            | --                            | --                     |

\* – the enhancement factor was impossible to estimate due to too low signal to noise level in spectra without  $\mu\text{W}$  irradiation.

\*\* –  $^{13}\text{CO}_2$  gas was used instead of  $^{13}\text{CO}$  gas.

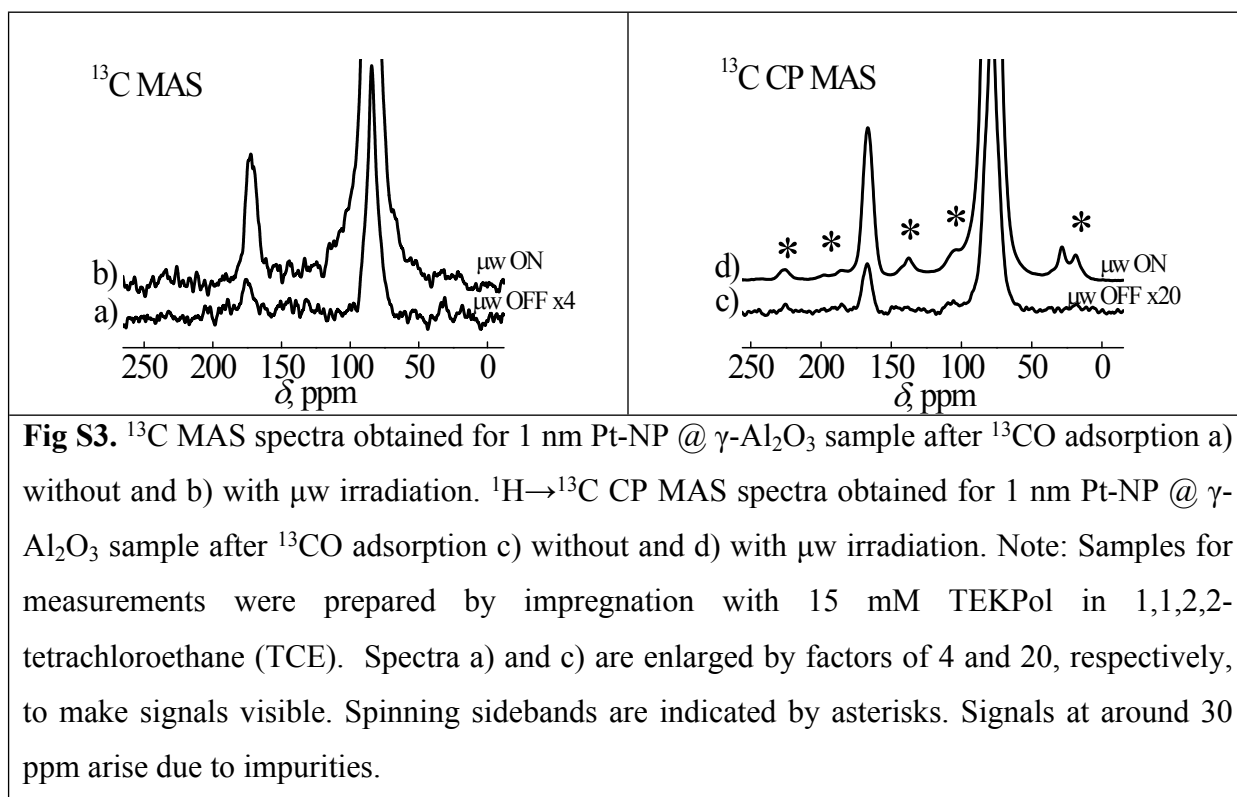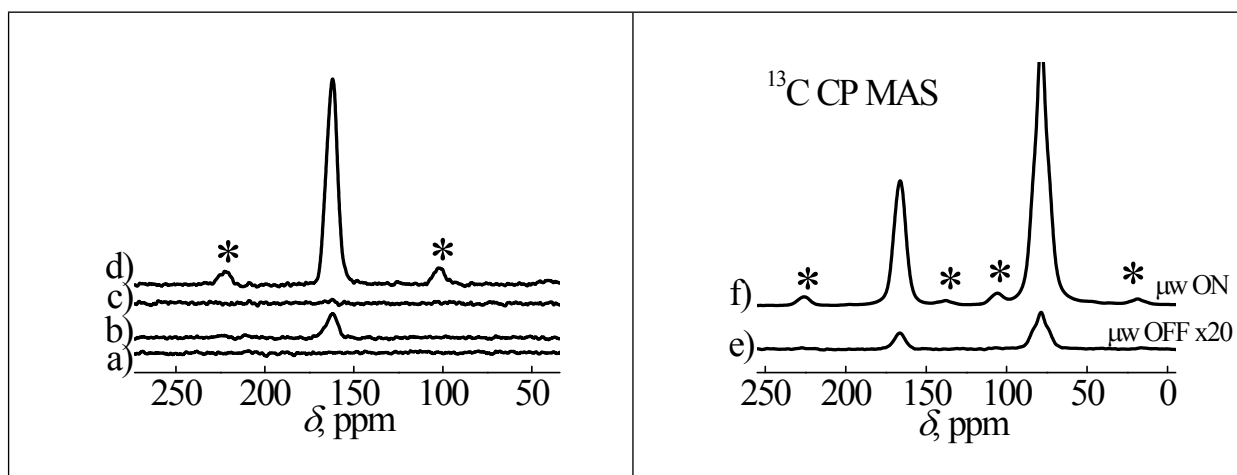

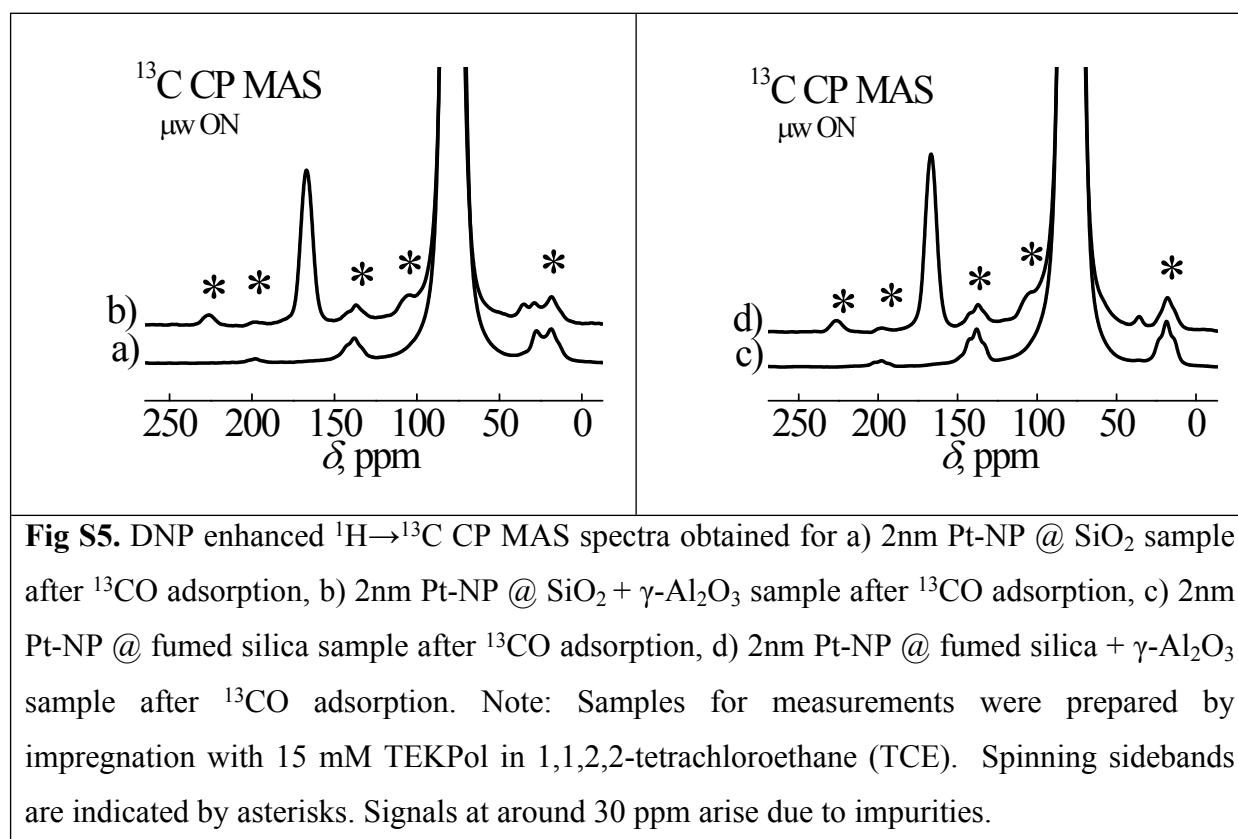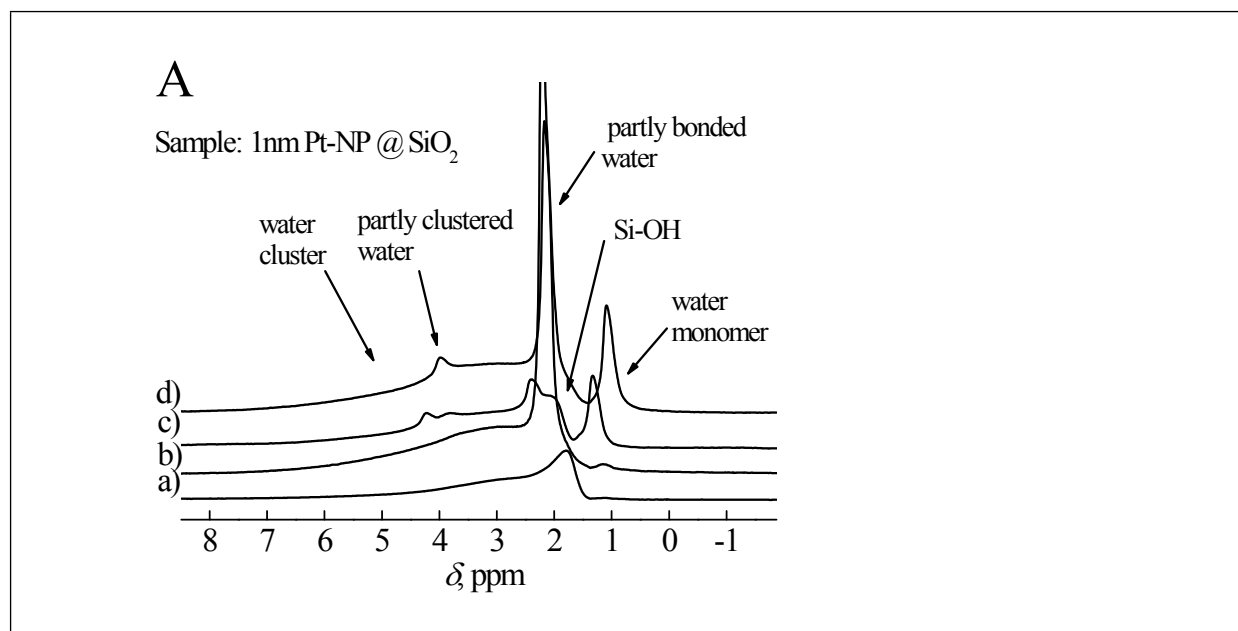

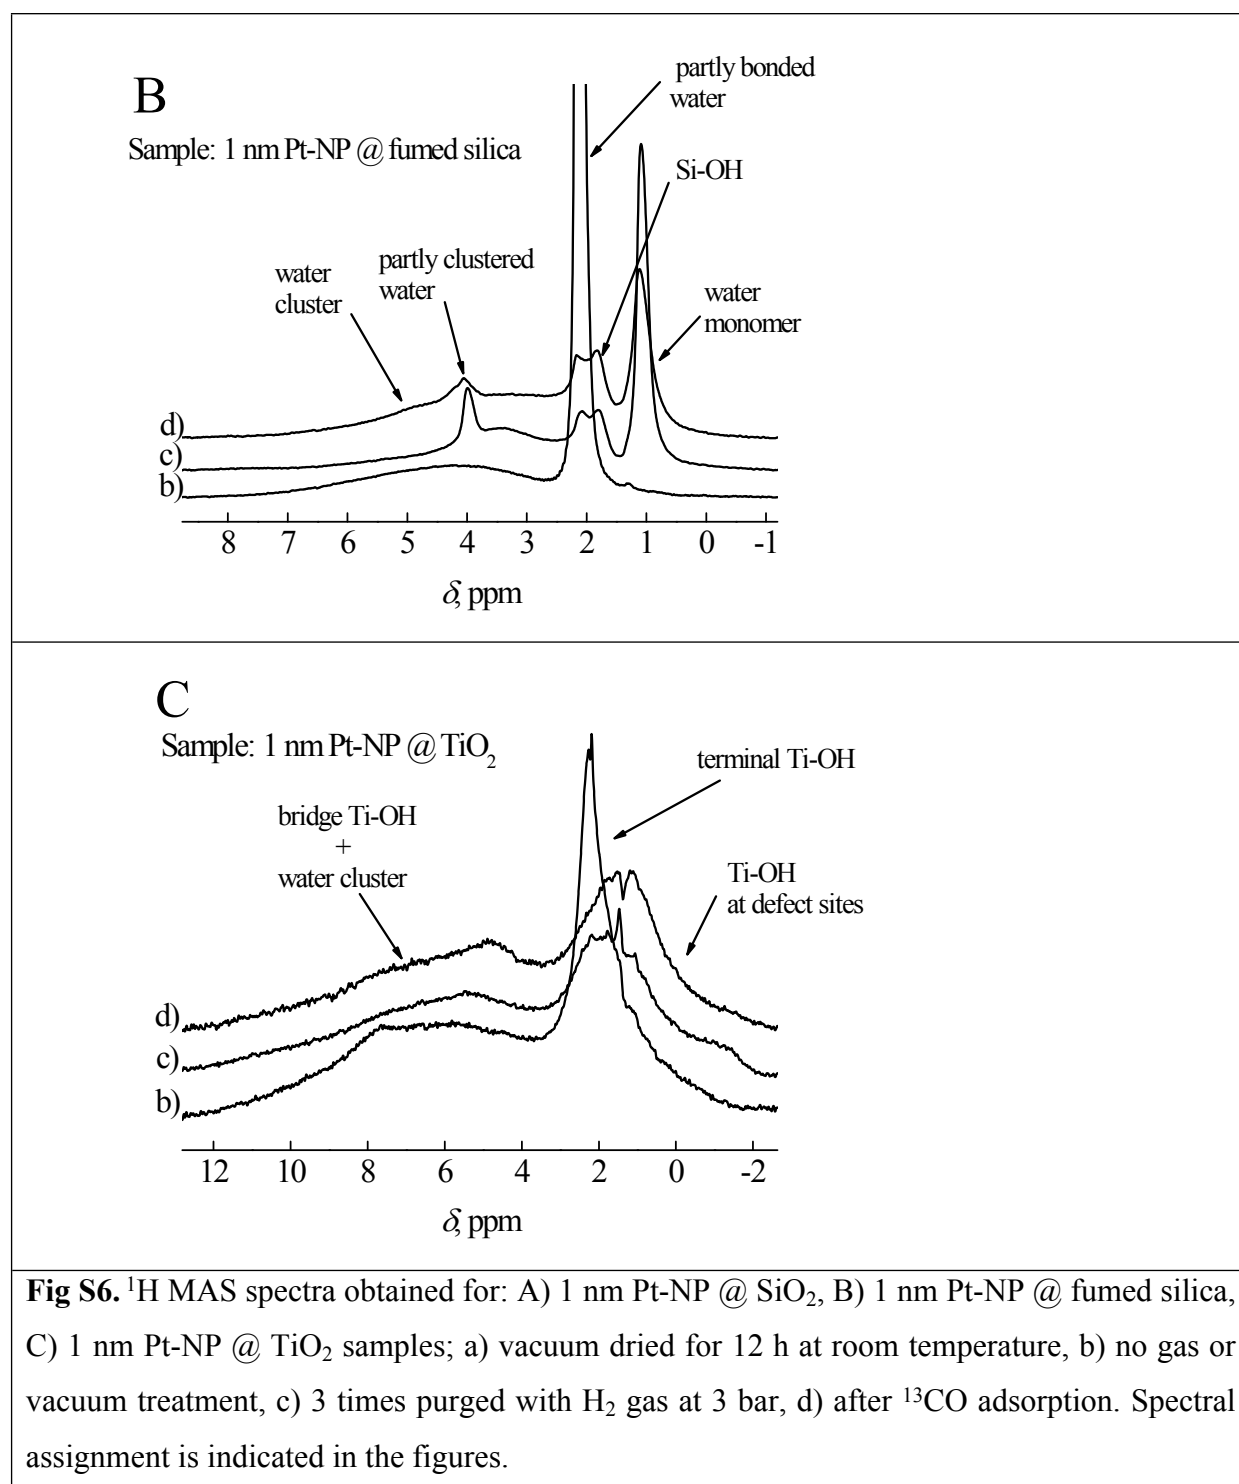

Supplement: c9cy00684b1.pdf [file c9cy00684b1.pdf]
